# Supplementary material for: Progressive alterations in multipotent hematopoietic progenitors underlie lymphoid cell loss in aging
Source: PubMed Central journal article supplement — J Exp Med. 2016 Oct 17;213(11):2259–67. doi: 10.1084/jem.20160168 (PMC5068232; doi:10.1084/jem.20160168), 2016-10-17
Supplement: JEM_20160168_sm.pdf [file JEM_20160168_sm.pdf]

Supplemental material

Young et al., <http://dx.doi.org/10.1084/jem.20160168>

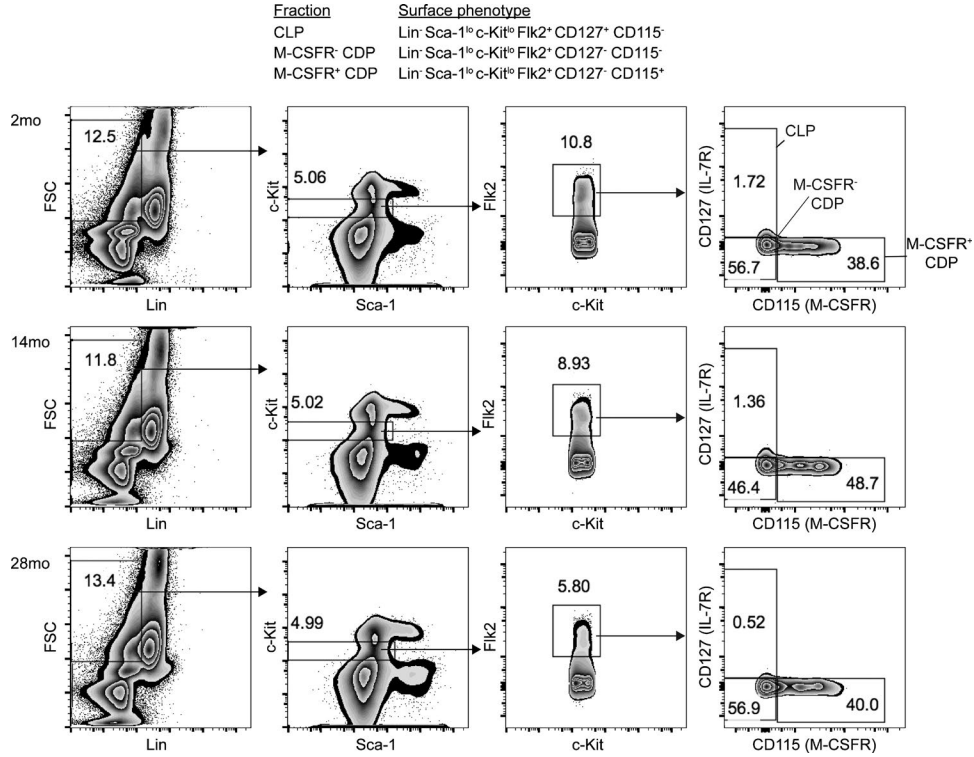

Figure S1. **FACS gating showing frequency of committed lymphoid progenitor cells in representative 2-mo, 14-mo, and 28-mo mice.** FACS gating showing frequency of CLP and CDP subsets in representative 2-mo, 14-mo, and 28-mo mice. The inset table defines surface markers used for cell isolation. FSC, forward side scatter.

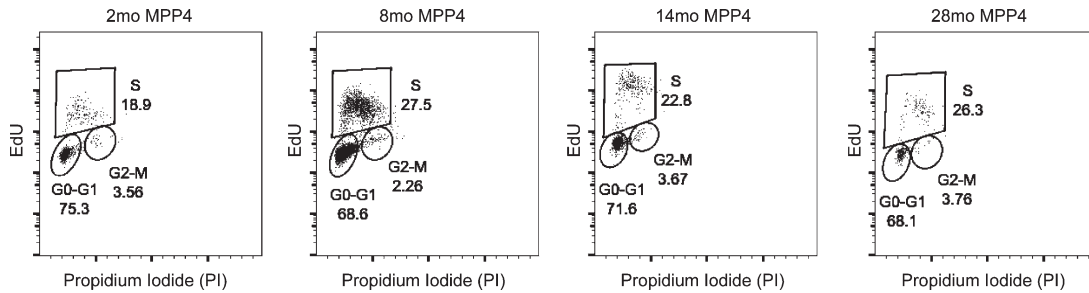

Figure S2. **FACS gating showing frequency of MPP4 cells in G0/G1, S, and G2/M cell cycle phases measured by EdU incorporation.** Representative 2-mo, 8-mo, 14-mo, and 28-mo mice are shown.

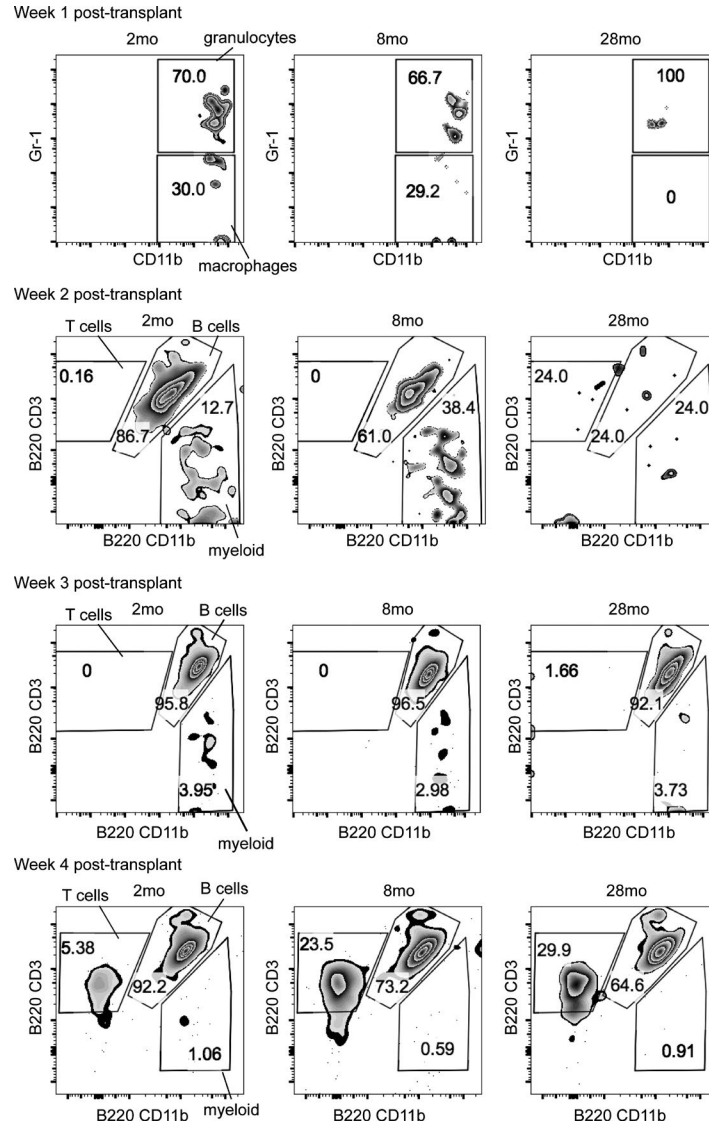

Figure S3. FACS gating showing frequency of donor CD45.2<sup>+</sup> myeloid, B cells, and T cells in peripheral blood of recipient mice at 1–4 wk after transplant of LMPP cells. Representative recipient mice transplanted with 2-mo, 8-mo, and 28-mo donor LMPP cells are shown.
